# Supplementary material for: On the Wegener granulomatosis associated region on chromosome 6p21.3
Source: PubMed Central journal article supplement (PMC1431512; doi:10.1186/1471-2350-7-21), 2006-03-09
Supplement: 1471-2350-7-21-S1.pdf [file 1471-2350-7-21-S1.pdf]

## **Information on the microsatellite panel used for EAS**

Pawel Szyld, Peter Jagiello *et al.*, 2005

### *Legend*

- 1) CoM = code of marker
- 2) chromStart corresponding to the UCSC freeze May 2004
- 3) chromEnd corresponding to the UCSC freeze May 2004
- 4) dist = Distance to previous marker
- 5) name = repetitive sequence
- 6) count = number of repetitions recommended
- 7) the tail CATCGCTGATTGCACAT was added to the 5'-end of each forward Primer
- 8) reverse primer in 5' to 3' direction
- 9) length of PCR amplicon includes 18 bp tail

| CoM        | chromStart | chromEnd | dist   | name  | count | forwardPrimer                             | reversePrimer         | PCR(length) |
|------------|------------|----------|--------|-------|-------|-------------------------------------------|-----------------------|-------------|
| #1.0.0.0   | 31257596   | 31257623 | 0      | AT    | 17,5  | CATCGCTGATTTCGCACATGCCACCATACCCCACTAATT   | CCGTCAAACCTTGACTGTTC  | 189         |
| #1.0.0.1   | 31312162   | 31312237 | 54539  | TTTC  | 10,0  | CATCGCTGATTTCGCACATCCCCACAAAAACCCCTGT     | CACTCCAGACGCGGCAAC    | 259         |
| #1.0.0.2   | 31367133   | 31367187 | 54896  | GT    | 21,0  | CATCGCTGATTTCGCACATCAAGCATATCTGCCATTTGG   | ATCTACCAGGGCCCAGTAGT  | 223         |
| #1.0.0.2.1 | 31417350   | 31417376 | 50163  | TTTG  | 8,8   | CATCGCTGATTTCGCACATTCCCTTAATTTTTCTTTTTGCC | ACCATTGCACTCCAGCCT    | 195         |
| #1.0.0.3   | 31457383   | 31457414 | 40007  | GT    | 23,0  | CATCGCTGATTTCGCACATACCACAGTCTCTATCAGTCCA  | TTTCTGCGTTTTTCAGCCT   | 168         |
| #1.0.0.4   | 31465639   | 31465733 | 8225   | TC    | 15,5  | CATCGCTGATTTCGCACATCTGGCCTGGACCTACTGTATC  | AAGGGTGTCTGACACCTGAC  | 248         |
| #1.0.0.5   | 31518185   | 31518230 | 52452  | GT    | 11,0  | CATCGCTGATTTCGCACATGTCAGGGAGGAGAGAAAAGTG  | GCTGGACTCTGCTAGGACAC  | 220         |
| #1.0.0.6   | 31562618   | 31562648 | 44388  | TC    | 16,5  | CATCGCTGATTTCGCACATCTGGCCTGGACCTACTGTATC  | GCAAGAAAGGGTGTCTGAC/  | 190         |
| #1.0.0.7   | 31579706   | 31579743 | 17058  | TG    | 23,0  | CATCGCTGATTTCGCACATAGTGTTCATTGCAGGC       | CAAATCCAAACCACAATGAG  | 208         |
| #1.0.0.7.1 | 31628000   | 31628046 | 48257  | TTTTG | 8,6   | CATCGCTGATTTCGCACATACCTCAAGTGATCCACCCA    | TGGGCGACAGAATGAGACT   | 173         |
| #1.0.0.8   | 31685399   | 31685441 | 57353  | GT    | 14,0  | CATCGCTGATTTCGCACATGGATAACAGAACGAGACCCTG  | TCAGTTGTGGTTGAAAAGAG  | 218         |
| #1.0.0.9   | 31728077   | 31728116 | 42636  | AC    | 18,0  | CATCGCTGATTTCGCACATCTCCCACGGTGTTCAG       | GAGACCGGAAGTGACGGT    | 155         |
| #1.0.1.0   | 31787584   | 31787634 | 59468  | AC    | 20,0  | CATCGCTGATTTCGCACATCCAAGCAGCTACAGTTTGCT   | GAACTCAGGATGGAGGGCT   | 186         |
| #1.0.1.1   | 31791707   | 31791746 | 4073   | GT    | 18,0  | CATCGCTGATTTCGCACATAGTTAAGGACCAGGGAGG     | AGAAAAACAGAACTGGCACA  | 273         |
| #1.0.1.2   | 31811564   | 31811606 | 19818  | CA    | 21,5  | CATCGCTGATTTCGCACATTGCTCTCACTCTCAGGCCT    | CAGCAGGGTTTAGAAGGGA   | 202         |
| #1.0.1.3   | 31814868   | 31814906 | 3262   | AC    | 22,5  | CATCGCTGATTTCGCACATCTTTCTCCCTCATAACCCCA   | GGACTCAAAGCGGTGAACA   | 148         |
| #1.0.1.4   | 31821837   | 31821870 | 6931   | TG    | 22,0  | CATCGCTGATTTCGCACATTGGCCAGTTGTGTCCAGT     | AGGCAGAGGTTGCATTGAG   | 152         |
| #1.0.1.5   | 31885313   | 31885351 | 63443  | AC    | 21,5  | CATCGCTGATTTCGCACATTGACAGGGCGAGACTGTCT    | GGAGAGTTCATGGAGAGAGC  | 185         |
| #1.0.1.5.1 | 31949675   | 31949703 | 64324  | ATTT  | 9     | CATCGCTGATTTCGCACATCACTTACTGCCATCCTTGCA   | CCTGGGTGACAGAGCAAGA   | 133         |
| #1.0.1.5.2 | 32014195   | 32014255 | 64492  | TA    | 33,5  | CATCGCTGATTTCGCACATGGTGCCTGGAATGTAGAACAT  | CGAGTTTCGCACCACTGTAGT | 183         |
| #1.0.1.6   | 32142832   | 32142941 | 128577 | AAGA  | 16,5  | CATCGCTGATTTCGCACATTACACTCTAGCCCAGGCGA    | CCACCCACTTCCTCCACTA   | 217         |
| #1.0.1.7   | 32153778   | 32153908 | 10837  | AGAA  | 18,3  | CATCGCTGATTTCGCACATCCTGGGCAACAGAGCTCA     | CACCACGCCTGACCACAA    | 210         |
| #1.0.1.7.1 | 32211745   | 32211783 | 57837  | AAAAC | 7,8   | CATCGCTGATTTCGCACATGGTTGCAGTGAGCCAAGAT    | CTCCTACCTTGTGCTGCTTC  | 179         |
| #1.0.1.8   | 32287350   | 32287399 | 75567  | AAAT  | 12,5  | CATCGCTGATTTCGCACATCAGACTGGGACTCCATCTCA   | TGTTAGTGGTCCCCAAGGTA  | 167         |
| #1.0.1.9   | 32352070   | 32352121 | 64671  | AT    | 27,0  | CATCGCTGATTTCGCACATAGGTTTCATCCATGTTGTACA  | GGCAAAGTCAAGAACTTCC   | 237         |
| #1.0.2.0   | 32362237   | 32362251 | 10116  | TA    | 13,5  | CATCGCTGATTTCGCACATGAACATATGAACGCACGTGTC  | CTGTGGAAAGCAGTTTGGAT  | 168         |
| #1.0.2.1   | 32377724   | 32377750 | 15473  | AAT   | 14,3  | CATCGCTGATTTCGCACATGGACATGCTATTTTTGCATGT  | CACAACACTCAACCCTGCT   | 262         |
| #1.0.2.2   | 32442808   | 32442833 | 65058  | GT    | 12,0  | CATCGCTGATTTCGCACATTCTTTCTCAACTCTCAGGGA   | ACCTCTCATTCTTGCTGGAA  | 178         |
| #1.0.2.3   | 32442999   | 32443033 | 166    | AG    | 26,5  | CATCGCTGATTTCGCACATCTCCAGCAAGAATGAGAGGT   | AGTATCCACTCACCAGGGCT  | 201         |
| #1.0.2.4   | 32446163   | 32446199 | 3130   | TA    | 10,5  | CATCGCTGATTTCGCACATAGGGAATCAGTGGTCTACGAA  | TGTTTTGAGTATGCATTGCC  | 201         |
| #1.0.2.5   | 32449996   | 32450040 | 3797   | TG    | 14,5  | CATCGCTGATTTCGCACATGCTAGTCTGTGCCAAGGAACT  | GAAGAAGGTGACCTGGACCT  | 164         |
| #1.0.2.6   | 32505535   | 32505566 | 55495  | AC    | 12,5  | CATCGCTGATTTCGCACATCAGCTCAAGGACAAGAGAGGA  | CCACATCCCAAAGACATGC   | 187         |
| #1.0.2.7   | 32511353   | 32511396 | 5787   | AC    | 16,0  | CATCGCTGATTTCGCACATCCTCCTTCAACACACAGACAC  | TGGAATCTCATCAAGGTCAG  | 125         |
| #1.0.2.7.2 | 32663146   | 32663179 | 151750 | TAAA  |       | CATCGCTGATTTCGCACATCAACAAAGCGAGACTCCATC   | GGAAATGGAGAGGCAGAAG/  | 195         |
| #1.0.2.8   | 32721614   | 32721644 | 58435  | GT    | 16,0  | CATCGCTGATTTCGCACATCATTGAGTTGTGTGCATT     | GACTGAGTCTGAGTTGGGCA  | 157         |

| CoM        | chromStart | chromEnd | dist   | name | count | forwardPrimer                             | reversePrimer         | PCR(length) |
|------------|------------|----------|--------|------|-------|-------------------------------------------|-----------------------|-------------|
| #1.0.2.9   | 32722622   | 32722639 | 978    | AG   | 12,5  | CATCGCTGATTTCGCACATCAGGGATGAAACCAACAAGAT  | CAGTCGGTGTCAATTTTTCTC | 227         |
| #1.0.3.0   | 32778135   | 32778163 | 55496  | GT   | 11,5  | CATCGCTGATTTCGCACATTGCCCTGAGGTCTATGCTG    | CAGCTCTTCTTAACCTGCCA  | 161         |
| #1.0.3.1   | 32825101   | 32825141 | 46938  | TG   | 10,0  | CATCGCTGATTTCGCACATTCAATGATTCATGAGCCAAGA  | TGCCATTCAATGTAAGCCTT/ | 119         |
| #1.0.3.1.2 | 32949071   | 32949113 | 123930 | TATT | 8     | CATCGCTGATTTCGCACATCCACCATGCCTGGCTAAT     | GTTTGAGACCAGCCTGATCA  | 123         |
| #1.0.3.2   | 32961966   | 32962013 | 12853  | GATA | 12,0  | CATCGCTGATTTCGCACATGGAGTCCATTGTGGTTGGA    | TCATGGTTGCTTTTCCTTCA  | 207         |
| #1.0.3.3   | 33008385   | 33008409 | 46372  | CA   | 11,5  | CATCGCTGATTTCGCACATTCTTTCTCCCACTCCACTTCT  | ATGGATGCTGCATGAGGA    | 207         |
| #1.0.3.4   | 33074791   | 33074851 | 66382  | TA   | 25,5  | CATCGCTGATTTCGCACATGGCAACATCTCAAGTCTCTC   | CTGCACAATGGAGTAATGCA  | 213         |
| #1.0.3.4.2 | 33160605   | 33160661 | 85754  | AAGG | 14,2  | CATCGCTGATTTCGCACATAGAGCGAGATTATGTCTCAA   | GGCTGGACTAGGAGCGT     | 149         |
| #1.0.3.5   | 33218303   | 33218333 | 57642  | AT   | 15,5  | CATCGCTGATTTCGCACATGAGTTTGAGACCAGCCTAGGA  | TCCTGGGTAACCTGGGACTAC | 149         |
| #1.0.3.6   | 33232070   | 33232096 | 13737  | AC   | 13,5  | CATCGCTGATTTCGCACATCCATCAGCTTTATTTGGATCA  | GCCCTCCTTGTGTCTTTGTT/ | 218         |
| #1.0.3.7   | 33281727   | 33281753 | 49631  | AG   | 13,5  | CATCGCTGATTTCGCACATGGTGGAGGGCAGAATCATT    | AATGTTTGCCAGGAACCTGTG | 119         |
| #1.0.3.8   | 33316475   | 33316533 | 34722  | TG   | 17,5  | CATCGCTGATTTCGCACATAAGGAAGTCTCAAAGGCTCTG  | TTGGTATGCCACTGCACAC   | 140         |
| #1.0.3.9   | 33321669   | 33321709 | 5136   | CA   | 20,5  | CATCGCTGATTTCGCACATTGGGCAGGACAAAAGTATTTTC | GCCACTGGAGAAGAATCAAC  | 142         |
| #1.0.4.0   | 33410343   | 33410371 | 88634  | AC   | 15,5  | CATCGCTGATTTCGCACATCAGAGCAAGATTCCGTCTCA   | GGCAGGGTTGGTTCTTTCT   | 157         |
| #1.0.4.1   | 33453896   | 33453965 | 43525  | AAAT | 12,5  | CATCGCTGATTTCGCACATAGAGCGAGACTCCGTCTCA    | GCACAGTGATCTCGTCAGTG  | 173         |
| #1.0.4.2   | 33485461   | 33485509 | 31496  | TG   | 24,5  | CATCGCTGATTTCGCACATGGAAGTGAAGACGGATCCA    | GATAGCCCTGGGACATGGT   | 175         |
| #1.0.4.3   | 33516845   | 33516900 | 31336  | TG   | 13,5  | CATCGCTGATTTCGCACATGTCTCCTGAGTCCCCAGAGAT  | CCTAGCCAAGAATGCAGAAG  | 149         |
| #1.0.4.4   | 33558564   | 33558650 | 41664  | TATC | 11,5  | CATCGCTGATTTCGCACATTTGTTTGTCTTTTGGCTGTTG  | AGGTTGCAGTGAGCCAAGT   | 201         |
| #1.0.4.5   | 33570645   | 33570680 | 11995  | GT   | 11,0  | CATCGCTGATTTCGCACATGCTAACAGCTCTGATCCACG   | AGGCAGAGGTTGCAGTGAG   | 153         |
| #1.0.4.6   | 33578171   | 33578205 | 7491   | TG   | 13,5  | CATCGCTGATTTCGCACATTTATTCTCCTGCCTCAGCCT   | TCCAGCATTGTGAAACCTCT  | 153         |
| #1.0.4.6.1 | 33638415   | 33638451 | 60210  | TTTA | 9,2   | CATCGCTGATTTCGCACATACCTCTGCTTCTGGGCT      | TGAGCTGAGATCGCACCA    | 205         |
| #1.0.4.7   | 33662781   | 33662810 | 24330  | AC   | 15,0  | CATCGCTGATTTCGCACATCCCCTGAGTGAGTGCACA     | CAGATGAGGAAACTGAGGCT  | 216         |
| #1.0.4.8   | 33689516   | 33689545 | 26706  | GT   | 15,0  | CATCGCTGATTTCGCACATGGTGTGCCAGTGTGTCTGA    | ACAGCCAGGGAGAGTGTAC/  | 169         |
| #1.0.4.8.2 | 33790633   | 33790667 | 101088 | TCAT | 8,8   | CATCGCTGATTTCGCACATGACCTGTTTGGAAATGTAGGCT | TGGGCCCCAGAAAATTATA   | 133         |
| #1.0.4.9   | 33827239   | 33827274 | 36572  | GT   | 18,0  | CATCGCTGATTTCGCACATGGGACAGACAACCTCTGCA    | TGCCCCCTAACCTGCTTCTA  | 157         |
| #1.0.5.0   | 33842742   | 33842787 | 15468  | CA   | 14,5  | CATCGCTGATTTCGCACATCCCCCAAACCTTAGTAGCTTCA | AACTTAGGTGCAGGCCGTA   | 146         |
| #1.0.5.1   | 33901448   | 33901504 | 58661  | ATA  | 13,7  | CATCGCTGATTTCGCACATGAGACATTTTTGCGGCAAT    | CTTCTGGGAATCATCCTGC   | 171         |
| #1.0.5.2   | 33950685   | 33950725 | 49181  | GT   | 18,0  | CATCGCTGATTTCGCACATATGTGTGGGCATGTGAGTG    | GTGTTTCTAACCTAGGACTGC | 126         |
| #1.0.5.3   | 34026337   | 34026378 | 75612  | GT   | 16,5  | CATCGCTGATTTCGCACATAGTCTGTGGGTCTGTATGCCT  | GAACTTCCCTGGGTGAGGT   | 129         |
| #1.0.5.4   | 34065262   | 34065304 | 38884  | TC   | 12,0  | CATCGCTGATTTCGCACATCTATGTGGCCATGGAAGTGT   | ACTGCACTCTAGCCTGGGA   | 160         |
| #1.0.5.5   | 34089739   | 34089759 | 24435  | AC   | 10,5  | CATCGCTGATTTCGCACATTGCGGAGTAGCTGGGACTA    | TGCGGAGTAGCTGGGACTA   | 142         |
| #1.0.5.6   | 34107725   | 34107755 | 17966  | AC   | 19,0  | CATCGCTGATTTCGCACATTGCGGAGTAGCTGGGACTA    | GGCTTTGGAAGTCAGAAGG/  | 128         |
| #1.0.5.7   | 34145403   | 34145443 | 37648  | GT   | 20,5  | CATCGCTGATTTCGCACATACACACTCCCGGCTTTACA    | CCAAATTCCTGGGTGCAT    | 154         |
| #1.0.5.8   | 34163555   | 34163596 | 18112  | AC   | 21,0  | CATCGCTGATTTCGCACATAGACATGCACCCCTACACAC   | GCTAGCCTGGTTCTTAGGGT  | 154         |
| #1.0.5.9   | 34173157   | 34173221 | 9561   | TG   | 11,0  | CATCGCTGATTTCGCACATCAGTGCAAAGGCCATGTG     | GCAGATCCAGGCACTAAGC   | 205         |

| CoM        | chromStart | chromEnd | dist   | name  | count | forwardPrimer                             | reversePrimer         | PCR(length) |
|------------|------------|----------|--------|-------|-------|-------------------------------------------|-----------------------|-------------|
| #1.0.6.0   | 34186865   | 34186909 | 13644  | AC    | 20,0  | CATCGCTGATTTCGCACATCGTCTCATGCATTTGGATATC  | AGTGTTCTTGCCTGTCTGAC, | 188         |
| #1.0.6.1   | 34187144   | 34187179 | 235    | CA    | 12,0  | CATCGCTGATTTCGCACATACTCACAGGCTCTTGGT      | CACTGTTAATGCTGCCTCCA  | 129         |
| #1.0.6.2   | 34212319   | 34212360 | 25140  | AC    | 21,0  | CATCGCTGATTTCGCACATGCTTCCAGATCCTTCGTGA    | GGTGTTCCTTTCTCCTCT    | 203         |
| #1.0.6.3   | 34230346   | 34230383 | 17986  | AC    | 19,0  | CATCGCTGATTTCGCACATAAGATGGGAGGTTAGATGGA   | CTGCTTTTTGTCCCGCAT    | 137         |
| #1.0.6.4   | 34256743   | 34256786 | 26360  | AAT   | 14,7  | CATCGCTGATTTCGCACATGTGAGCCGAGATAGTGCCA    | GACTTCAGTGATCTGCCTGC  | 204         |
| #1.0.6.5   | 34296689   | 34296712 | 39903  | CA    | 12,0  | CATCGCTGATTTCGCACATTGGTGCTTTTGCCAACTTA    | AGCCTCCTGAGTAACTGGGA  | 195         |
| #1.0.6.5.1 | 34372332   | 34372370 | 75620  | ATAC  | 9,8   | CATCGCTGATTTCGCACATCCAGACCCTGTTCGGTAAATAC | CATCGCTGGCACATATACTG  | 157         |
| #1.0.6.6   | 34430150   | 34430191 | 57780  | AC    | 17,5  | CATCGCTGATTTCGCACATCCTATGAACAGCCATTGCAC   | GATTACAGGCGTGAGCCAC   | 146         |
| #1.0.6.7   | 34434014   | 34434047 | 3823   | AC    | 17,0  | CATCGCTGATTTCGCACATCCTCCAAGGTTTCTTACCCA   | TGGGAAGTTTCAACATCCTG  | 178         |
| #1.0.6.8   | 34472071   | 34472095 | 38024  | AC    | 25,0  | CATCGCTGATTTCGCACATGGACCCTGTCTCAAAACACAC  | CACTGTCCCTGGCCTAGAAT  | 174         |
| #1.0.6.9   | 34480476   | 34480525 | 8381   | AC    | 12,0  | CATCGCTGATTTCGCACATTACTGATACATCCCGGACA    | CATGTGGAGAGGAGCAGGT   | 122         |
| #1.0.7.0   | 34526036   | 34526070 | 45511  | AAT   | 11,7  | CATCGCTGATTTCGCACATGCCAAGATCATGCCATTGT    | GGCCTCTCAAAGTGTGGA    | 161         |
| #1.0.7.1   | 34538170   | 34538215 | 12100  | GT    | 23,0  | CATCGCTGATTTCGCACATGGAAGCATGGAAGTTGTGTC   | GCTTCCCTAAAGCTGAATTC, | 187         |
| #1.0.7.2   | 34539237   | 34539268 | 1022   | CAT   | 10,7  | CATCGCTGATTTCGCACATTTGCAATAACCCTATGAGGC   | ATGGCAACAGCACCTACCT   | 155         |
| #1.0.7.2.1 | 34573794   | 34573834 | 34526  | TGTT  | 10,2  | CATCGCTGATTTCGCACATGAATCACCTGGAGAACCCTGA  | GACAGAGGGAGACCACGTC   | 158         |
| #1.0.7.2.2 | 34688972   | 34689003 | 115138 | AAC   | 10,7  | CATCGCTGATTTCGCACATGGGTGACAGAGTGAGACCCT   | TGGATGTGAGCTCCAACCTA  | 159         |
| #1.0.7.3   | 34749583   | 34749613 | 60580  | AC    | 16,0  | CATCGCTGATTTCGCACATGGGTGACAGAGAGATCCTGTC  | CTCACCCATTTCTGTTCT    | 152         |
| #1.0.7.3.1 | 34782160   | 34782193 | 32547  | AAAAC | 9     | CATCGCTGATTTCGCACATTGGCAACAGTGCAAGACTCT   | GGAGTCTCTCTGTTGCCAT   | 173         |
| #1.0.7.3.2 | 34841161   | 34841209 | 58968  | ATTT  | 11,8  | CATCGCTGATTTCGCACATTCCCTTTCTCCTTCCTGGA    | GCAATGGAGCAAGACTCAAT  | 150         |
| #1.0.7.3.3 | 34877452   | 34877491 | 36243  | TTTA  | 9,8   | CATCGCTGATTTCGCACATGAAGCATTGTCCCTTGTCT    | GAGACAGAGCGAGACTCCG   | 208         |
| #1.0.7.3.4 | 34928289   | 34928337 | 50798  | CCTCT | 9,8   | CATCGCTGATTTCGCACATGCAAGACAAAGTCCCCTGTAT  | TGGGATAGCCAAAGGAATG   | 183         |
| #1.0.7.4   | 34989375   | 34989406 | 61038  | TTG   | 10,7  | CATCGCTGATTTCGCACATGTTACCATGCCTGGCCTAA    | CGGAGTTATGAGCCAAGAT   | 148         |
| #1.0.7.5   | 34999846   | 34999883 | 10440  | GT    | 19,0  | CATCGCTGATTTCGCACATATGGCCTCCAGGATCTAT     | GTCACAGACCTGGCTGGAT   | 167         |
